# Supplementary material for: PWAS Hub for exploring gene-based associations of common complex diseases
Source: Genome Res. 2024 Oct;34(10):1674–86. doi: 10.1101/gr.278916.123 (PMC11529988; doi:10.1101/gr.278916.123)
Supplement: Supplement 3 [file Supplemental_TableS1.xlsx]

## Sheet: J45-file (2)
Supplementary Table S1 (a). PWAS-significant genes for asthma (J45)
gene_symbol	gene_name	rank	uniprot_id	combined_fdr_qval	combined_pval	dominant_avg_score_cases	dominant_avg_score_controls	dominant_cohen_d	dominant_pval	dominant_std_score	dominant_std_score_cases	dominant_std_score_controls	fdr_qval	recessive_avg_score	recessive_avg_score_cases	recessive_avg_score_controls	recessive_cohen_d	recessive_pval	recessive_std_score	recessive_std_score_cases	recessive_std_score_controls
GSDMB	gasdermin B	1	Q8TAX9	2.83391e-09	2.53699e-13	0.276024	0.256001	0.0487418	8.49989e-13	0.405869	0.416789	0.404737	2.83391e-09	0.770652	0.782306	0.769508	0.0332251	1.45285e-06	0.388159	0.381584	0.388781
HLA-DQA2	major histocompatibility complex, class II, DQ alpha 2	2	P01906	2.83391e-09	3.17899e-13	0.681696	0.697958	-0.0519415	3.28051e-14	0.312335	0.314009	0.312133	2.83391e-09	0.994302	0.99394	0.994338	-0.00636002	0.485519	0.0618993	0.0634202	0.0617479
IL1RL1	interleukin 1 receptor like 1	3	Q01638	1.88687e-08	4.02944e-12	0.316519	0.300999	0.0362813	3.22039e-07	0.425276	0.430816	0.424703	1.88687e-08	0.938465	0.947434	0.937584	0.0417953	3.46282e-09	0.241229	0.228767	0.242401
AGER	advanced glycosylation end-product specific receptor	4	Q15109	1.88687e-08	4.23326e-12	0.855566	0.86998	-0.0462558	7.05738e-13	0.305924	0.318458	0.304635	1.88687e-08	0.996439	0.996325	0.99645	-0.00229361	0.812316	0.0542614	0.0552346	0.0541649
ZPBP2	zona pellucida binding protein 2	5	Q6X784	3.1604e-08	8.9215e-12	0.334707	0.318667	0.0442551	8.31051e-11	0.358267	0.367494	0.357317	3.1604e-08	0.782326	0.793373	0.781241	0.0339244	1.03672e-06	0.360284	0.35433	0.360846
HLA-DRA	major histocompatibility complex, class II, DR alpha	6	P01903	3.1604e-08	1.06357e-11	0.471526	0.482181	-0.0484849	2.86598e-12	0.22396	0.214562	0.22484	3.1604e-08	0.821343	0.815863	0.821881	-0.0252827	0.000476603	0.237308	0.23892	0.237143
FLG	filaggrin	7	P20930	8.72978e-08	3.42748e-11	0.326631	0.332936	-0.0242174	0.000191975	0.260124	0.260686	0.260063	8.72978e-08	1.02674	1.01917	1.02748	-0.0318539	2.12442e-06	0.255689	0.26693	0.254547
PSMB9	proteasome 20S subunit beta 9	8	P28065	4.32833e-07	1.94215e-10	0.510533	0.530072	-0.0437427	1.64935e-10	0.447338	0.445907	0.447441	4.32833e-07	0.932342	0.926855	0.932881	-0.0253468	0.000208701	0.233894	0.242364	0.233039
HSPA1L	heat shock protein family A (Hsp70) member 1 like	9	P34931	3.46659e-05	1.74992e-08	0.595072	0.59965	-0.0319684	5.0396e-06	0.144271	0.141906	0.144495	3.46659e-05	0.946939	0.945197	0.94711	-0.0189468	0.00678196	0.100381	0.101787	0.100241
TLR1	toll like receptor 1	10	Q15399	3.55952e-05	1.99648e-08	0.579446	0.565719	0.0330792	1.23703e-08	0.415005	0.414955	0.414991	3.55952e-05	0.979888	0.978822	0.979993	-0.00861969	0.308311	0.135177	0.136701	0.135026
LST1	leukocyte specific transcript 1	11	O00453	0.000212538	1.3113e-07	0.747682	0.757538	-0.0365381	2.73938e-08	0.268598	0.271192	0.268326	0.000212538	0.980133	0.978697	0.980274	-0.0216416	0.000768718	0.0714744	0.0744809	0.0711708
AAGAB	alpha and gamma adaptin binding protein	12	Q6PD74	0.0019932	1.34155e-06	0.717281	0.70969	0.028908	6.71573e-06	0.262423	0.262821	0.262375	0.0019932	0.961162	0.963719	0.960911	0.0246034	0.000180224	0.115645	0.112262	0.11597
TSPAN8	tetraspanin 8	13	P19075	0.0029812	2.17374e-06	0.403638	0.389168	0.0324451	1.96771e-06	0.444211	0.448195	0.443797	0.0029812	0.925263	0.9302	0.924778	0.0190444	0.00636406	0.287264	0.281583	0.287812
PPP1R18	protein phosphatase 1 regulatory subunit 18	14	Q6NYC8	0.00444725	3.49215e-06	0.832945	0.840641	-0.0310356	3.77143e-06	0.246403	0.249855	0.246051	0.00444725	0.99045	0.990744	0.990421	0.00510208	0.441986	0.0636585	0.0626821	0.0637536
MUC21	mucin 21, cell surface associated	15	Q5SSG8	0.00871015	7.32808e-06	0.375325	0.383623	-0.0347924	1.16406e-06	0.239265	0.237595	0.239416	0.00871015	0.934919	0.937416	0.934674	0.014483	0.0477104	0.189061	0.189737	0.188993
IL33	interleukin 33	16	O95760	0.0126647	1.13655e-05	0.988979	0.985166	0.0355222	1.5441e-06	0.11426	0.0982701	0.115706	0.0126647	0.999971	1	0.999968	0.00929087	0.660549	0.00464878	0.000101006	0.00487164
LY6G5B	lymphocyte antigen 6 family member G5B	17	Q8NDX9	0.0169908	1.62008e-05	0.829419	0.819386	0.0282708	1.77419e-05	0.358237	0.350803	0.358947	0.0169908	0.995718	0.9967	0.995622	0.0183939	0.0124671	0.0621496	0.0539899	0.0628933
PSORS1C2	psoriasis susceptibility 1 candidate 2	18	Q9UIG4	0.0205037	2.07004e-05	0.169442	0.172063	-0.019739	0.00926442	0.133601	0.131856	0.133769	0.0205037	0.40862	0.399067	0.409559	-0.0335409	3.93148e-06	0.315357	0.30964	0.315898
TRIM47	tripartite motif containing 47	19	Q96LD4	0.0219219	2.33618e-05	0.774642	0.784427	-0.0281553	7.87022e-06	0.345687	0.349836	0.345265	0.0219219	0.985076	0.983865	0.985195	-0.0130136	0.0272984	0.100397	0.104338	0.100001
CXCL2	C-X-C motif chemokine ligand 2	20	P19875	0.0258229	2.89674e-05	0.974566	0.977124	-0.0300891	5.24814e-06	0.0831572	0.0871958	0.0827466	0.0258229	0.999849	0.999852	0.999849	0.000586135	0.970953	0.00543869	0.00561817	0.00542076
OTULINL	OTU deubiquitinase with linear linkage specificity like	21	Q9NUU6	0.0270372	3.18459e-05	0.824697	0.832723	-0.0294168	8.11793e-06	0.269891	0.276411	0.269232	0.0270372	0.994916	0.994446	0.994962	-0.0102551	0.100898	0.0490934	0.0518466	0.0488145
TLR10	toll like receptor 10	22	Q9BXR5	0.0286963	3.54097e-05	0.614955	0.605965	0.0237138	1.55179e-05	0.379219	0.378994	0.379232	0.0286963	1.0165	1.01543	1.0166	-0.0129409	0.0324994	0.0905776	0.0907069	0.0905644
MFSD12	major facilitator superfamily domain containing 12	23	Q6NUT3	0.0397181	5.12376e-05	0.939195	0.93418	0.0263465	1.4114e-05	0.19383	0.185977	0.194578	0.0397181	0.999805	0.999749	0.99981	-0.00415533	0.494182	0.0137822	0.0156769	0.0135819
STARD3	StAR related lipid transfer domain containing 3	24	Q14849	0.0399904	5.3832e-05	0.221632	0.214791	0.0261761	0.000117387	0.257962	0.265423	0.25721	0.0399904	0.641362	0.64986	0.640527	0.0231678	0.00119311	0.403366	0.402237	0.403468
HLA-DRB1	major histocompatibility complex, class II, DR beta 1	25	P01911	0.0425455	5.96577e-05	0.0160887	0.0196403	-0.0275372	0.000288959	0.134106	0.122444	0.135193	0.0425455	0.153497	0.14481	0.15435	-0.0262529	0.00035658	0.366852	0.359169	0.367588
IER5L	immediate early response 5 like	26	Q5T953	0.0488605	7.3367e-05	0.896044	0.893093	0.0295338	3.41035e-05	0.100037	0.0998171	0.100054	0.0488605	0.988021	0.988611	0.987963	0.0182062	0.00959895	0.0359357	0.0351349	0.036013
C22orf46	chromosome 22 putative open reading frame 46	27	C9J442	0.0488605	7.39936e-05	0.0969075	0.0939368	0.0170666	0.0139273	0.170957	0.177773	0.170271	0.0488605	0.403062	0.414548	0.401934	0.0291045	3.7387e-05	0.431785	0.435388	0.431414

## Sheet: enrichr
Supplementary Table S1 (b). Analysis of EnrichR-KB statistics for the 27 PWAS-significant genes for J45.
Term	Library	q-value	Z-score	combined score
Self-reported allergy	GWAS Catalog	4.8003e-08	141.6	2900
Asthma	KEGG	0.0001731	89.04	1029
Allograft rejection	KEGG	0.0001937	71.21	778.2
Allergic rhinitis	GWAS Catalog	6.3579e-09	64.98	1479
Asthma	GWAS Catalog	6.9883e-10	50.71	1331
Antigen processing and presentation	KEGG	0.0001731	46.77	587.4
Rheumatoid arthritis	KEGG	0.0001731	38.85	460.7
Toxoplasmosis	KEGG	0.0001937	31.99	355.7
Ulcerative colitis	GWAS Catalog	6.9883e-10	30.17	774
Inflammatory bowel disease	GWAS Catalog	2.4773e-09	22.12	530.7
Term	Library	q-value	Z-score	combined score
Self-reported allergy	GWAS	4.8003e-08	141.6	2900
Allergic rhinitis	GWAS	6.3579e-09	64.98	1479
Asthma	GWAS	6.9883e-10	50.71	1331
Cytokines and Inflammatory Response WP530	WikiPathway	0.00019	108.4	1311
Asthma	KEGG	0.0001731	89.04	1029
Simplified Depiction of MYD88 Distinct Input-Output Pathway WP3877	WikiPathway	0.003003	99.78	821.8
Allograft rejection	KEGG	0.0001937	71.21	778.2
Ulcerative colitis	GWAS	6.9883e-10	30.17	774
Pathogenesis of SARS-CoV-2 Mediated by nsp9-nsp10 Complex WP4884	WikiPathway	0.003084	84.02	665.6
Antigen processing and presentation	KEGG	0.0001731	46.77	587.4
Inflammatory bowel disease	GWAS	2.4773e-09	22.12	530.7
Rheumatoid arthritis	KEGG	0.0001731	38.85	460.7
Toxoplasmosis	KEGG	0.0001937	31.99	355.7
Allograft Rejection WP2328	WikiPathway	0.003003	28.91	242.1
Ebola Virus Pathway on Host WP4217	WikiPathway	0.004656	19.69	143.5
