# Supplementary material for: PWAS Hub for exploring gene-based associations of common complex diseases
Source: Genome Res. 2024 Oct;34(10):1674–86. doi: 10.1101/gr.278916.123 (PMC11529988; doi:10.1101/gr.278916.123)
Supplement: Supplement 4 [file Supplemental_TableS2.xlsx]

## Sheet: result_GLOBAL_THREASHOLD_0.1_GE
Supplemental Table S2. Phenotypes by OT scoring (Global and GA) and PWAS. Hypergeometric distribution statistics for the overlapping results
#	Phenotype	Pheenotype name	PWAS	Global (0.1)_	GA (0.1)	Global-PWAS	GA-PWAS	Global overlap pval	GA overlap pval
5	E03	Other hypothyroidism	77	348	375	18	21	5.02536e-15	3.70303e-18
11	K80	Cholelithiasis	17	108	119	8	10	2.98254e-14	2.02043e-18
27	E11	Non-insulin-dependent diabetes mellitus	38	1348	1383	20	19	2.277e-13	4.7061e-12
8	I10	Essential (primary) hypertension	70	106	102	10	10	9.33458e-12	6.32657e-12
22	J45	Asthma	27	628	652	12	13	3.02674e-11	1.98861e-12
14	I20	Angina pectoris	7	179	149	5	5	1.89433e-09	7.5094e-10
1	I48	Atrial fibrillation and flutter	18	137	101	5	5	1.84811e-07	4.02256e-08
18	E66	Obesity	6	403	96	4	4	3.55145e-06	1.12798e-08
10	M16	Coxarthrosis [arthrosis of hip]	6	122	112	3	4	5.95617e-06	2.10512e-08
16	D12	Benign neoplasm of colon, rectum, anus and anal canal	5	27	34	2	3	2.15777e-05	6.13621e-08
12	N40	Hyperplasia of prostate	17	59	38	1	1	0.0529165	0.034726
19	E78	Disorders of lipoprotein metabolism and other lipidaemias	33	3119	91	9	7	0.0563903	2.52321e-10
2	M13	Other arthritis	1	1147	905	1	1	0.0637222	0.0502778
20	C50	Malignant neoplasm of breast	2	4772	377	2	2	0.0702731	0.00043753
25	K40	Inguinal hernia	15	117	64	1	2	0.0890591	0.0012494
9	C44	Other malignant neoplasms of skin	46	2731	55	5	1	0.129517	0.122759
28	F32	Depressive episode	1	486	540	0	0	0.973	0.97
23	K44	Diaphragmatic hernia	8	10	13	0	0	0.995563	0.994236
6	D64	Other anaemias	2	22	0	0	0	0.997557	1
3	H269	Cataract, unspecified	0	283	111	0	0	1	1
4	F17	Mental and behavioural disorders due to use of tobacco	0	81	17	0	0	1	1
7	K21	Gastro-oesophageal reflux disease	0	144	130	0	0	1	1
13	J18	Pneumonia, organism unspecified	0	78	24	0	0	1	1
15	K52	Other non-infective gastro-enteritis and colitis	0	703	595	0	0	1	1
17	K635	Polyp of colon	0	54	51	0	0	1	1
21	K30	Dyspepsia	0	21	0	0	0	1	1
24	I84	Haemorrhoids	0	144	148	0	0	1	1
26	K590	Constipation	0	37	4	0	0	1	1
