# Supplementary material for: PWAS Hub for exploring gene-based associations of common complex diseases
Source: HighWire-hosted journal article supplement (doi:10.1101/gr.278916.123), 2024-10-01
Supplement: Supplemental_FigS1.pdf [file Supplemental_FigS1.pdf]

# PWAS Hub for exploring gene-based associations of common complex diseases

Supplemental Figure S1

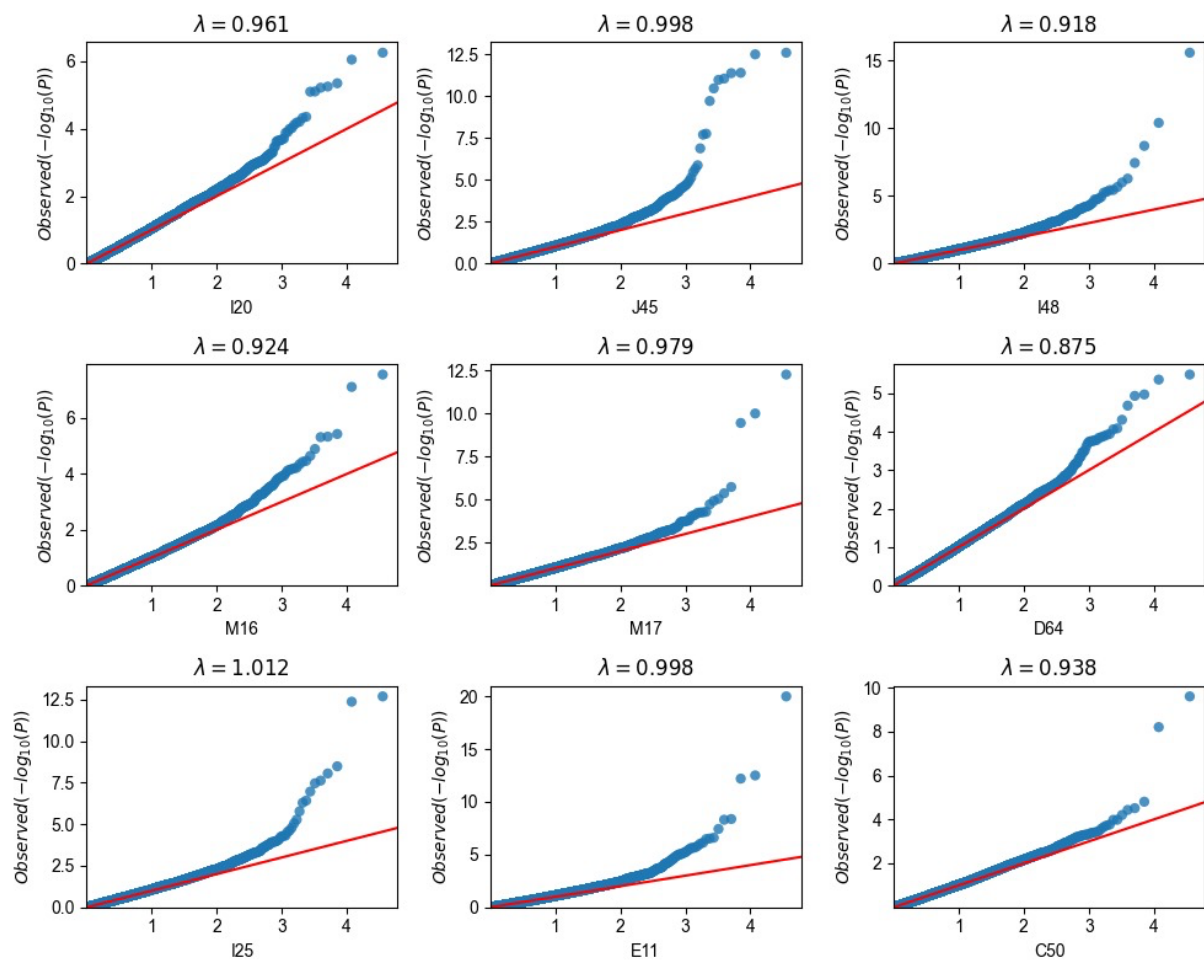

**Figure S1.** QQ plots of 9 representative phenotypes (indicated by the ICD-10). The phenotypes are selected by having >10 PWAS significant genes when analyzed for ‘both’. The x-axis shows the  $-\log_{10}$  of expected p-values of the association from the theoretical chi-square distribution, and the y-axis shows the  $-\log_{10}$  of p-values from the observed chi-square distribution under FDR correction with  $\alpha = 0.05$ . The genomic inflation factor  $\lambda$  is defined as the median of the observed chi-squared test statistic divided by the expected median of the corresponding chi-squared distribution. We show that most  $\lambda$  values are close to 1.0 (i.e., no evidence of inflation), exception is QQ plot for D64 (other anemia) with  $\lambda$  of 0.875.
